# Supplementary material
Source: Elsevier journal article supplement (https://www.sciencedirect.com/science/article/pii/S0120884520300419)
Supplement: mmc1 [file S0120884520300419:mmc1.docx]

**ANEXOS**

**Tabla 1. Características socio-demográficas**

| **Variable** | | **Número (%)** |
| --- | --- | --- |
| **Sexo** n (%) | Masculino | 56 (73.7) |
| **Edad** mediana (RIQ) | 45 (35 - 59) | |
| **Nivel educativo** n (%) | Analfabeta | 6 (17.1) |
| Primaria | 16 (45.7) |
| Secundaria | 9 (25.7) |
| Universitaria y/o técnico | 4 (11.5) |
| **Estado laboral** n (%) | Desempleado | 60 (82.2) |
| Empleado | 8 (11.0) |
| Pensionado | 5 (6.8) |
| **Residencia** n (%) | Rural | 4 (5.3) |
| Urbano | 72 (94.7) |
| **Régimen de seguridad social** n (%) | Subsidiado | 57 (75) |
| Contributivo | 18 (23.7) |
| Especial (maestros y fuerzas militares) | 1 (1.3) |
| **Tabaquismo** n (%) | Activo | 13 (32.5) |
| Exfumador | 12 (30) |
| Ninguno | 15 (37.5) |
| **Consumo de psicoactivos** n (%) | Marihuana | 8 (25.8) |
| Pasta básica de cocaína | 2 (6.5) |
| Ninguno | 21 (67.7) |
|  |  | |
| **Albergue al alta** n (%) | No | 64 (86.5) |
| Si | 48 (69.6) |

**Tabla 2. Características clínicas**

| **Variable** | | **Número (%)** |
| --- | --- | --- |
| **Días de hospitalización** mediana (RIQ) | 22.5 (16 - 35) | |
| **Factor asociado a restricción movilidad** n (%) | Lesión medular | 54 (69.7) |
| ECV | 9 (11.7) |
| Demencia | 7 (9.2) |
| Otros* | 7 (9.2) |
| Mielopatía | 2 (2.6) |
| Mielitis transversa | 1 (1.3) |
| Tumor cerebral | 1 (1.3) |
| Neuropatía Periférica | 1 (1.3) |
| **Comorbilidad** n (%) | HTA | 18 (23.7) |
| Diabetes | 8 (10.5) |
| Falla cardiaca | 4 (5.3) |
| EPOC | 4 (5.3) |
| **Localización de la UPP** n (%) | Sacra | 48 (63.2) |
| Isquiática Bilateral | 23 (30.2) |
| Otras localizaciones miembro inferior | 18 (23.7) |
| Trocantérica Bilateral | 16 (21) |
| Isquiática unilateral | 16 (21) |
| Trocantérica unilateral | 14 (18.4) |
| Miembro superior | 3 (3.9) |
| **Numero de UPP** n (%) | Única | 24 (31.6) |
| Múltiple (2 o más) | 52 (68.49 |
| **Colostomía** n (%) | Si | 16 (25.4) |
| **Cistostomía** n (%) | Si | 9 (11.8) |
| **Otros focos de infección actual** n (%) | Ninguno | 62 (81.6) |
| Sistema urinario | 7 (9.2) |
| Bacteriemia | 6 (7.9) |
| Otros osteomusculares | 1 (1.3) |
| **Clasificación de la ulcera** n (%) | IV | 55 (72.4) |
| **Colgajo por plástica** n (%) | Si | 15 (19.7) |
| **Curaciones ambulatorias** n (%) | Si | 39 (51.3) |

*Aflojamiento de prótesis de cadera, Carcinoma pulmón, amputado supracondíleo de fémur bilateral, esclerosis múltiple, fractura bilateral de cadera, hemiparesia post TEC con osteosíntesis de cadera, ulcera en crónica en pierna.

**Tabla 3. Microorganismos aislados**

| **Microorganismos** | **Número de pacientes con el MO (%)** |
| --- | --- |
| **COCOS GRAM POSITIVOS (93)** |  |
| ***Enterococcus faecalis*** | 35 (46.05) |
| ***Streptococcus* spp *** | 27 (35.52) |
| ***Staphylococcus aureus*** | 19 (25) |
| Meticilino sensible | 14 (18.42) |
| Meticilino resistente | 5 (6.57) |
| ***Enterococcus avium*** | 6 (7.89) |
| ***Staphylococcus* coagulasa negativa**** | 4 (5.26) |
| *Enterococcus faecium* | 1 (1.31) |
| *Kocuria kristinae* | 1 (1.31) |
| **BACILOS GRAM NEGATIVOS (86)** |  |
| ***Escherichia coli*** | 33 (43.42) |
| *E. coli* BLEE - | 24 (31.57) |
| *E. coli* BLEE + | 9 (11.84) |
| ***Proteus* spp $** | 23 (30.26) |
| ***Klebsiella pneumoniae*** | 9 (11.84) |
| *K. pneumoniae* BLEE- | 4 (5.26) |
| *K. pneumoniae* BLEE+ | 5 (6.57) |
| ***Pseudomonas aeruginosa*** | 9 (11.84) |
| *Pseudomonas* resistente a carbapenémicos | 5 (6.57) |
| *Pseudomonas* sin resistencia | 4 (5.26) |
| ***Morganella morganii*** | 7 (9.21) |
| ***Providencia* sp** | 2 (2.63) |
| ***Enterobacter* spp “** | 1 (1.31) |
| ***Serratia*** | 1 (1.31) |
| ***Acinetobacter* sp** | 1 (1.31) |
| **OTROS (2)** |  |
| ***Candida albicans*** | 1 (1.31) |
| ***Corynebacterium* spp** | 1 (1.31) |

* *mitis, agalactiae, dysgalactiae, anginosus, porcinus, sanguinis*

** *epidermidis, haemolyticus, hominis*

$ *vulgaris, mirabilis*

“ *cloacae, aerogenes*

BLEE: betalactamasa de espectro extendido
